# Supplementary material for: Using Zinc Oxide Nanoparticles to Improve the Color and Berry Quality of Table Grapes Cv. Crimson Seedless
Source: MDPI journal article supplement (doi:10.3390/plants10071285), 2021-06-24
Supplement: s1 [file s1]

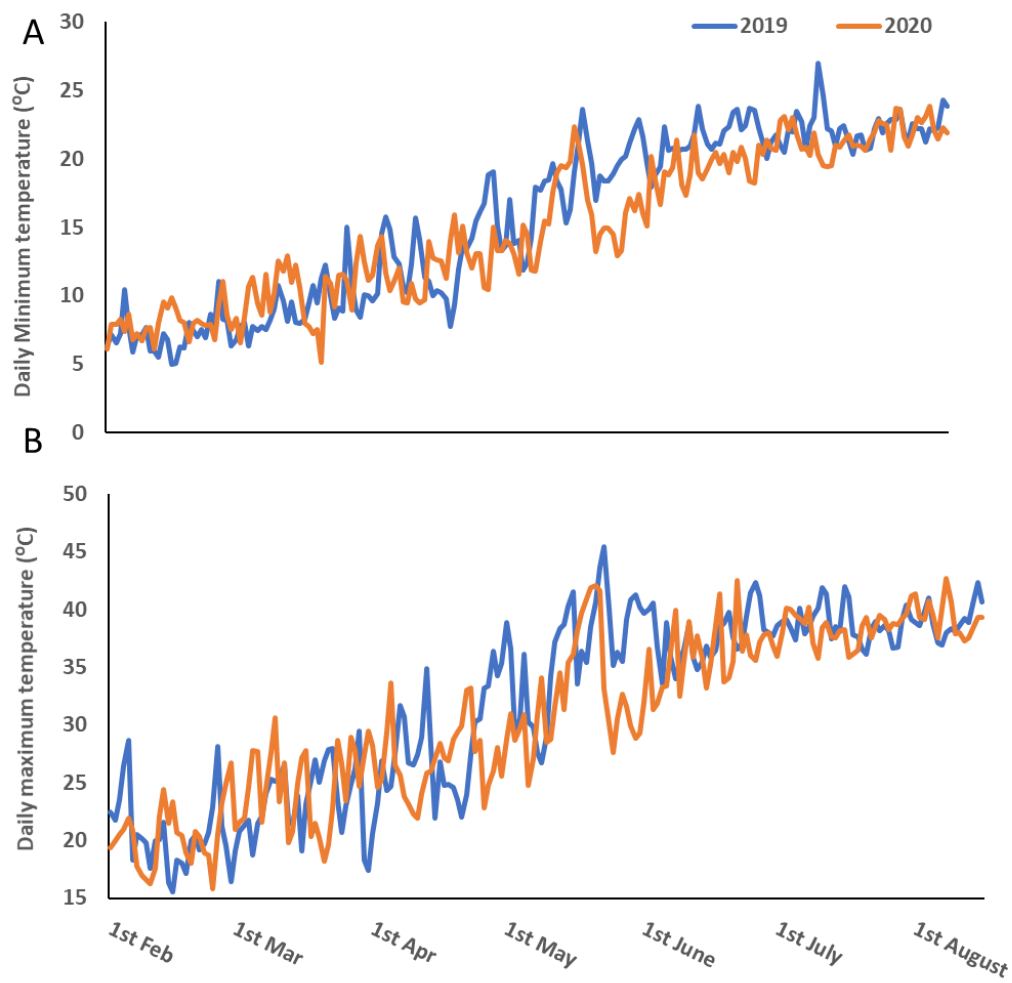

**Figure S1.** Daily minimum and maximum temperature (A & B) between February to August during the two seasons 2019 and 2020 in the experimental site.

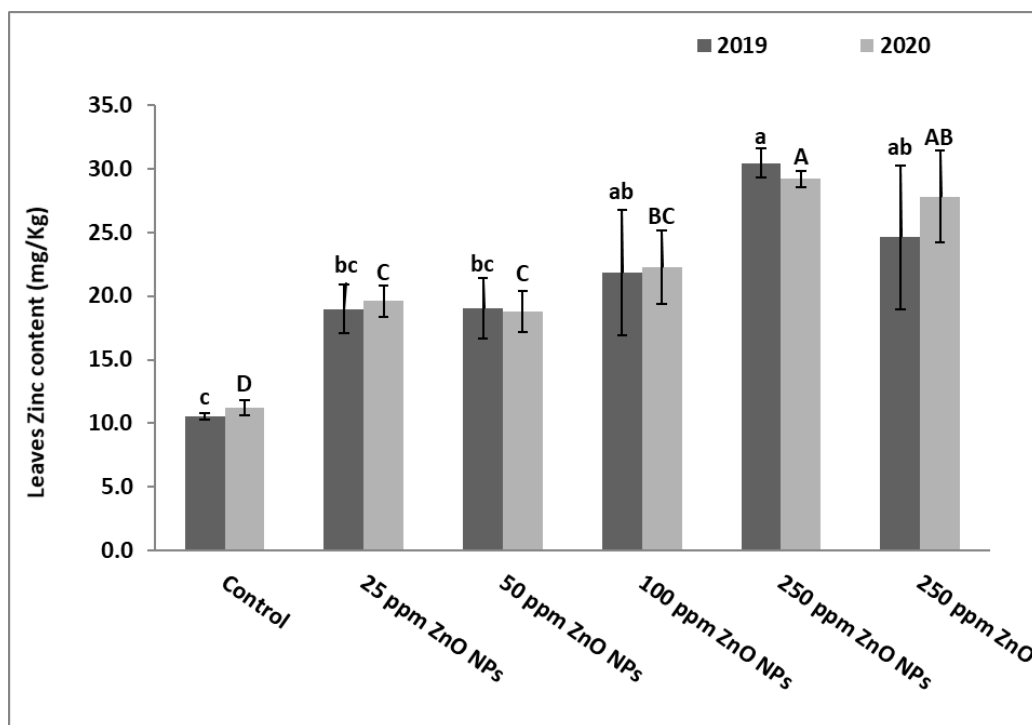

**Figure S2.** Leaves Zinc content of Crimson seedless grapes following different treatments with ZnO and ZnO NPs. Different letters indicate differences based on Duncan's multiple range test.
